# Supplementary material for: “Well, to Be Honest, I Don’t Have an Idea of What It Might Be”—A Qualitative Study on Knowledge and Awareness Regarding Nonmelanoma Skin Cancer
Source: MDPI journal article supplement (doi:10.3390/curroncol30020177), 2023-02-15
Supplement: s1 [file s1]

Supplementals

# “Well, To Be Honest, I Don’t Have an Idea of What It Might Be” — A Qualitative Study on Knowledge and Awareness Regarding Nonmelanoma Skin Cancer

Luisa Leonie Brokmeier <sup>1</sup>, Katharina Diehl <sup>1,\*</sup>, Bianca Annika Spähn <sup>2</sup>, Charlotte Jansen <sup>2</sup>, Tobias Konkel <sup>1</sup>, Wolfgang Uter <sup>3</sup> and Tatiana Görig <sup>1</sup>

**Table S1.** Early signs of NMSC reported by interviewees.

| Type of signs                        | Quotes stated by participants                                                                                                                                                                                                           |
|--------------------------------------|-----------------------------------------------------------------------------------------------------------------------------------------------------------------------------------------------------------------------------------------|
| Changes of skin not further defined  | S01: <i>‘have no idea, I can’t, umm, estimate that. Let me say [...] if I notice changes on the skin [...], I will go to the dermatologist and get it checked.’</i>                                                                     |
|                                      | S10: <i>‘To be honest, I don’t have a lot of knowledge, but I think like how my mother had it, that was something like a uhm / well something similar to a swelling on the skin [...]’</i>                                              |
|                                      | S17: <i>‘[...] they would be [...] of a different color and of a different texture, how the skin feels, from normal skin to a cancer area, has to be different.’</i>                                                                    |
|                                      | S18: <i>‘The normal skin as well. It could be that on a normal area there is a sudden change / so not just these birthmarks.’</i>                                                                                                       |
| Itching, rough skin                  | S04: <i>‘Umm, rough skin. And I don’t know, up there I had, but that was some kind of bump, that was correct //’</i>                                                                                                                    |
|                                      | S07: <i>‘Umm well, I think, changes of the skin, possibly also itching or so.’</i>                                                                                                                                                      |
|                                      | S11: <i>‘You can see it somehow. Something appears or maybe it itches or so and then you can see that there is something. Or there is a redness, and so on.’</i>                                                                        |
|                                      | S12: <i>‘Um, I think one will maybe realize that there is perhaps some rough skin spots or something like that or maybe it also itches, I don’t know that exactly.’</i>                                                                 |
|                                      | I: <i>‘[...] so, indicators, would you know any [...]?’</i> S02: <i>‘Oh god no, well I can only imagine that maybe there is some kind of itching, that one has to scrub and scratch constantly. [...] I can’t imagine how that is.’</i> |
| Reddish skin areas / skin areas that | S16: <i>‘Ah yes, on the one hand the, the skin changes. Skin changes and (.) I guess there is also some kind of um, itching or something like that as well!’</i>                                                                        |
|                                      | S06: <i>‘The symptoms, that there are, well, areas on the skin, which won’t heal or which, um, look wound-like, and (.) abnormal’</i>                                                                                                   |

|                                         |                                                                                                                                                                                                                                                                                                                                                                                                                                                                                                                                                                                                                                                                                                                                                                                                                                                                                                                           |
|-----------------------------------------|---------------------------------------------------------------------------------------------------------------------------------------------------------------------------------------------------------------------------------------------------------------------------------------------------------------------------------------------------------------------------------------------------------------------------------------------------------------------------------------------------------------------------------------------------------------------------------------------------------------------------------------------------------------------------------------------------------------------------------------------------------------------------------------------------------------------------------------------------------------------------------------------------------------------------|
| bleed or heal<br>poorly                 | <p>S03: <i>'Yes. Like red pimples or (.) whatever that was and it got bigger. And after I had showered or rubbed it with the towel, it also started bleeding.'</i></p> <p>S08: <i>'Umm, well, first I thought I had a wart. But then it got infected and, um, it was painful and turned quite red, so I went to the dermatologist. [...] I don't know, whether it always looks like this, I can't say. But if it looked like it did on me or if I felt it, I would know that it's that.'</i></p> <p>S11: <i>'You can see it somehow. Something appears or maybe it itches or so and then you can see that there is something. Or there is a redness, and so on.'</i></p> <p>S13: <i>'(..) (sighs) Not really, I just have, I can only speak for myself, I have realized it because of this small pimple and also up here, there was some sort of small growth, but other than that I didn't notice anything, no.'</i></p> |
| Nevi; dark discolorations of skin areas | <p>S05: <i>'Yes, probably some sort of change on the skin, (..) well here I have those spots for example, these black ones, yes, with these my doctor always tells me / big, noticeable ones, but the doctor always tells me that those are not a big deal. It's only a little blemish.'</i></p> <p>S18: <i>'Yes but those / but not just those brown spots, I / I think, [...] if one has birthmarks that are changing, which then [...] look completely different.'</i></p>                                                                                                                                                                                                                                                                                                                                                                                                                                             |
| Light discolorations of skin areas      | <p>S09: <i>'Well, um, skin spots becoming lighter.'</i></p> <p>S19: <i>'Like I said, I think there are perhaps white spots, which don't look exactly round or which have a / which have a different structure compared to pigmentation disorders or spots that are usually on the skin.'</i></p> <p>S20: <i>'Yes, like I said, light skin spots, on the arms or the stomach, the legs, the buttocks, where it can appear, I would say light spots on the skin.'</i></p>                                                                                                                                                                                                                                                                                                                                                                                                                                                   |
